# Supplementary material for: Ancient pigment to treasure: Prussian blue as a cheap solid cyanide/nitrogen dual-source affording the high-yield syntheses of pricey endohedral clusterfullerenes
Source: Royal Society of Chemistry journal article supplement (doi:10.1039/d0qi01492c), 2021-01-01
Supplement: d0qi01492c1.pdf [file d0qi01492c1.pdf]

Electronic Supplementary Material (ESI)

This journal is © The Royal Society of Chemistry 2020

**Ancient pigment to treasure: Prussian blue as a cheap solid  
cyanide/nitrogen dual-source affording high-yield syntheses of pricey  
endohedral clusterfullerenes**

Jinpeng Xin,<sup>a,†</sup> Fei Jin,<sup>a,†</sup> Runnan Guan,<sup>a</sup> Muqing Chen,<sup>a</sup> Xiao-Ming Xie,<sup>b</sup> Qianyan  
Zhang,<sup>\*b</sup> Su-Yuan Xie,<sup>b</sup> and Shangfeng Yang<sup>\*a</sup>

<sup>a</sup> Hefei National Laboratory for Physical Sciences at Microscale, CAS Key Laboratory of Materials for Energy Conversion, Department of Materials Science and Engineering, Synergetic Innovation Center of Quantum Information & Quantum Physics, University of Science and Technology of China, Hefei 230026, China

<sup>b</sup> State Key Lab for Physical Chemistry of Solid Surfaces, Collaborative Innovation Center of Chemistry for Energy Materials, Department of Chemistry, College of Chemistry and Chemical Engineering, Xiamen University, Xiamen 361005, China

**Table of Contents**

*S1. Isolation and Estimation of the relative yields of DyCN@C<sub>82</sub> (C<sub>2</sub>(5), C<sub>s</sub>(6), C<sub>2v</sub>(9)).....S2*  
*S2. Thermal decomposition mechanism of K<sub>3</sub>[Fe(CN)<sub>6</sub>] and K<sub>4</sub>[Fe(CN)<sub>6</sub>] .....S7*  
*S3. X-ray crystallographic analysis of DyCN@C<sub>82</sub> (C<sub>2</sub>(5), C<sub>s</sub>(6), C<sub>2v</sub>(9)). .....S8*  
*S4. UV-vis-NIR spectroscopic data of DyCN@C<sub>82</sub> (C<sub>2</sub>(5), C<sub>s</sub>(6), C<sub>2v</sub>(9)).....S10*  
*S5. Cyclic voltammograms of DyCN@C<sub>82</sub> (C<sub>2</sub>(5), C<sub>s</sub>(6), C<sub>2v</sub>(9)) in different scanning regions.  
.....S11*

**S1. Isolation and Estimation of the relative yields of DyCN@C<sub>82</sub> (C<sub>2</sub>(5), C<sub>s</sub>(6), C<sub>2v</sub>(9)).**

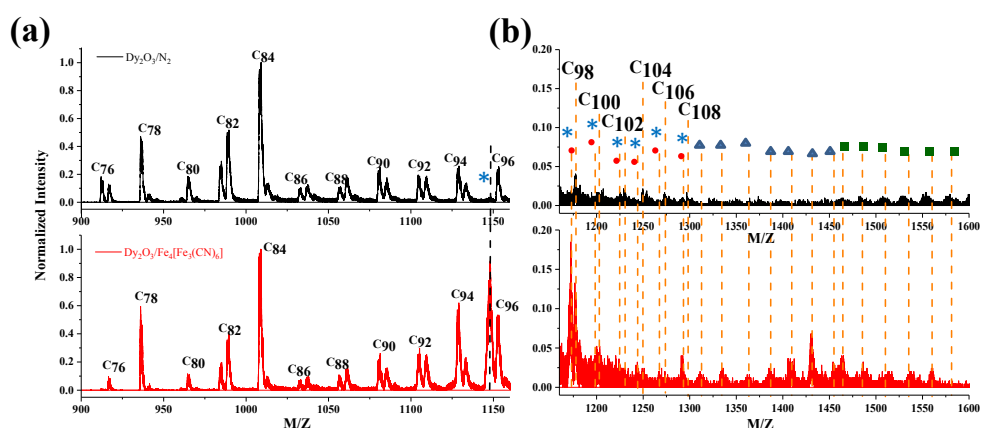

**Fig. S1. MALDI-TOF mass spectra of the HPLC fractions obtained from Dy<sub>2</sub>O<sub>3</sub>/N<sub>2</sub> and Dy<sub>2</sub>O<sub>3</sub>/Fe<sub>4</sub>[Fe(CN)<sub>6</sub>]<sub>3</sub> extracts with retention time longer than 12 min. (a) Spectra in the M/Z range of 900 - 1160; (b) Spectra in the M/Z range of 1160 - 1600. \* indicates Dy@C<sub>2n</sub> (n=41-53);  $\blacktriangle$  indicates Dy<sub>2</sub>C<sub>2n</sub> (n=41-47);  $\bullet$  indicates DyCN@C<sub>2n</sub> (2n=41-46);  $\blacksquare$  indicates Dy<sub>3</sub>N@C<sub>2n</sub> (n=40-45).**

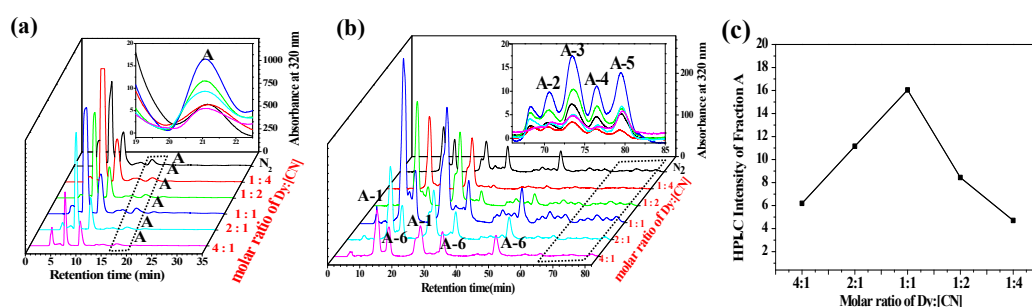

**Fig. S2. HPLC chromatograms of Dy<sub>2</sub>O<sub>3</sub>/Fe<sub>4</sub>[Fe(CN)<sub>6</sub>]<sub>3</sub> extracts with different Dy:[CN] molar ratios and HPLC intensity of fraction A. (a) HPLC chromatograms of Dy<sub>2</sub>O<sub>3</sub>/Fe<sub>4</sub>[Fe(CN)<sub>6</sub>]<sub>3</sub> fullerene extracts with different Dy:[CN] molar ratios (20 mm×250 mm 5PYE column; flow rate 15.0 mL min<sup>-1</sup>; injection volume 15 mL; toluene as the eluent (mobile phase); 40 °C). The dotted rhombus marks the enlarged region containing fraction A. Inset: the enlarged region of retention time ranging from 19 to 23 min. (b) Recycling HPLC chromatograms of fraction A obtained with different Dy:[CN] molar ratios (10 mm×250 mm BPM column; flow rate 5.0 mL min<sup>-1</sup>; injection volume 5 mL; toluene as the eluent (mobile phase); 40 °C). The dotted rhombus marks the enlarged region containing subfractions A-2 to A-6 shown in the inset of Fig. 2c. Inset: the enlarged region of retention time ranging from 66 to 85 min. (c) Dependence of HPLC peak intensity of fraction A on the Dy:[CN] molar ratio.**

**Table S1. Estimation of the relative yields of DyCN@C<sub>82</sub>(C<sub>2</sub>(5), C<sub>3</sub>(6), C<sub>2v</sub>(9)) to that of Dy<sub>3</sub>N@C<sub>80</sub> obtained from different extracts.**

| Extract (fraction)                                                                                                             | Dy <sub>2</sub> O <sub>3</sub> /N <sub>2</sub><br>(fraction A) | Dy <sub>2</sub> O <sub>3</sub> /<br>Fe <sub>4</sub> [Fe(CN) <sub>6</sub> ] <sub>3</sub><br>(fraction A) | Dy <sub>2</sub> O <sub>3</sub> /<br>K <sub>3</sub> [Fe(CN) <sub>6</sub> ]<br>(fraction A) | Dy <sub>2</sub> O <sub>3</sub> /<br>K <sub>4</sub> [Fe(CN) <sub>6</sub> ]<br>(fraction A) |
|--------------------------------------------------------------------------------------------------------------------------------|----------------------------------------------------------------|---------------------------------------------------------------------------------------------------------|-------------------------------------------------------------------------------------------|-------------------------------------------------------------------------------------------|
| Integrated area of fraction<br><b>A-1</b> (C <sub>86</sub> )                                                                   | 137.16                                                         | 662.57                                                                                                  | 649.37                                                                                    | 411.30                                                                                    |
| Integrated area of fraction<br><b>A-2+A-3+A-4+A-5</b><br>(DyCN@C <sub>2n</sub> (2n=76, 82))                                    | 31.53                                                          | 88.99                                                                                                   | 76.24                                                                                     | 58.50                                                                                     |
| Integrated area of fraction<br><b>A-6</b> (Dy <sub>3</sub> N@C <sub>80</sub> )                                                 | 80.12                                                          | 175.31                                                                                                  | 165.58                                                                                    | 107.09                                                                                    |
| Relative yield of fraction<br><b>A-2+A-3+A-4+A-5</b> to<br>Dy <sub>3</sub> N@C <sub>80</sub>                                   | 39.4%                                                          | 50.8%                                                                                                   | 46.0%                                                                                     | 54.6%                                                                                     |
| Integrated area of fraction<br><b>A-3</b> (DyCN@C <sub>2</sub> (5)-C <sub>82</sub> )                                           | 17.37                                                          | 51.19                                                                                                   | 49.90                                                                                     | 35.92                                                                                     |
| Relative yield of fraction <b>A-3</b> to<br><b>A-2+A-3+A-4+A-5</b>                                                             | 55.1%                                                          | 57.5%                                                                                                   | 65.5%                                                                                     | 61.4%                                                                                     |
| Relative yield of fraction <b>A-3</b><br>(DyCN@C <sub>2</sub> (5)-C <sub>82</sub> ) to<br>Dy <sub>3</sub> N@C <sub>80</sub>    | <b>21.7%</b>                                                   | <b>29.2%</b>                                                                                            | <b>30.1%</b>                                                                              | <b>33.5%</b>                                                                              |
| Integrated area of fraction<br><b>A-4</b> (DyCN@C <sub>3</sub> (6)-C <sub>82</sub> )                                           | 8.49                                                           | 26.41                                                                                                   | 26.08                                                                                     | 18.21                                                                                     |
| Relative yield of fraction <b>A-4</b> to<br><b>A-2+A-3+A-4+A-5</b>                                                             | 26.9%                                                          | 29.7%                                                                                                   | 34.2%                                                                                     | 31.1%                                                                                     |
| Relative yield of fraction<br><b>A-4</b> (DyCN@C <sub>3</sub> (6)-C <sub>82</sub> ) to<br>Dy <sub>3</sub> N@C <sub>80</sub>    | <b>10.6%</b>                                                   | <b>15.1%</b>                                                                                            | <b>15.7%</b>                                                                              | <b>17.0%</b>                                                                              |
| Integrated area of fraction<br><b>A-5</b> (DyCN@C <sub>2v</sub> (9)-C <sub>82</sub> )                                          | 11.33                                                          | 42.06                                                                                                   | 34.60                                                                                     | 29.17                                                                                     |
| Relative yield of fraction <b>A-5</b> to<br><b>A-2+A-3+A-4+A-5</b>                                                             | 35.9%                                                          | 47.3%                                                                                                   | 45.4%                                                                                     | 49.9%                                                                                     |
| Relative yield of fraction <b>A-5-3</b><br>to <b>A-5</b>                                                                       | 70.2%                                                          | 70.2%                                                                                                   | 70.2%                                                                                     | 70.2%                                                                                     |
| Relative yield of fraction<br><b>A-5-3</b> (DyCN@C <sub>2v</sub> (9)-C <sub>82</sub> ) to<br>Dy <sub>3</sub> N@C <sub>80</sub> | <b>9.9%</b>                                                    | <b>16.8%</b>                                                                                            | <b>14.7%</b>                                                                              | <b>19.1%</b>                                                                              |

Given that the yield is proportional to the integrated area of HPLC peak of the corresponding fraction, the relative yields of DyCN@C<sub>82</sub> (C<sub>2</sub>(5), C<sub>s</sub>(6), C<sub>2v</sub>(9)) to Dy<sub>3</sub>N@C<sub>80</sub> obtained from Dy<sub>2</sub>O<sub>3</sub>/Fe<sub>4</sub>[Fe(CN)<sub>6</sub>]<sub>3</sub> extract can be calculated as:

$$\text{DyCN@C}_2(5)\text{-C}_{82} : \text{Dy}_3\text{N@C}_{80} = 51.19/175.31 \times 100\% = 29.2\%$$

$$\text{DyCN@C}_s(6)\text{-C}_{82} : \text{Dy}_3\text{N@C}_{80} = 26.41/175.31 \times 100\% = 15.1\%$$

$$\text{DyCN@C}_{2v}(9)\text{-C}_{82} : \text{Dy}_3\text{N@C}_{80} = 42.06/175.31 \times 70.2\% \times 100\% = 16.8\%$$

**Table S2. The relative yields and retention times of DyCN@C<sub>82</sub>(C<sub>2</sub>(5), C<sub>s</sub>(6), C<sub>2v</sub>(9)).**

| Extract (fraction)                            |                                                                                         | DyCN@C <sub>2</sub> (5)-C <sub>82</sub><br>(A-3) | DyCN@C <sub>s</sub> (6)-C <sub>82</sub><br>(A-4) | DyCN@C <sub>2v</sub> (9)-C <sub>82</sub><br>(A-5) |
|-----------------------------------------------|-----------------------------------------------------------------------------------------|--------------------------------------------------|--------------------------------------------------|---------------------------------------------------|
| Isomer label                                  |                                                                                         | I                                                | II                                               | III                                               |
| Retention time ( <i>t<sub>ret</sub></i> /min) |                                                                                         | 22.63-26.86                                      | 25.46-29.56                                      | 26.37-30.82                                       |
| Relative yield                                | Dy <sub>2</sub> O <sub>3</sub> /N <sub>2</sub>                                          | 21.7%                                            | 10.6%                                            | 9.9%                                              |
|                                               | Dy <sub>2</sub> O <sub>3</sub> /<br>Fe <sub>4</sub> [Fe(CN) <sub>6</sub> ] <sub>3</sub> | 29.2%                                            | 15.1%                                            | 16.8%                                             |
|                                               | Dy <sub>2</sub> O <sub>3</sub> /<br>K <sub>3</sub> [Fe(CN) <sub>6</sub> ]               | 30.1%                                            | 15.7%                                            | 14.7%                                             |
|                                               | Dy <sub>2</sub> O <sub>3</sub> /<br>K <sub>4</sub> [Fe(CN) <sub>6</sub> ]               | 34.1%                                            | 17.0%                                            | 19.1%                                             |

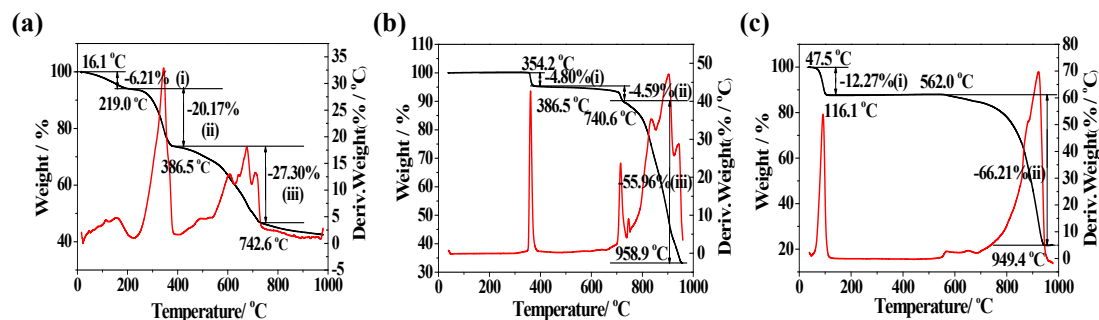

**Fig. S3. TGA curves of (a) Fe<sub>4</sub>[Fe(CN)<sub>6</sub>]<sub>3</sub>, (b) K<sub>3</sub>[Fe(CN)<sub>6</sub>] and (c) K<sub>4</sub>[Fe(CN)<sub>6</sub>]. The temperature increase rate for all measurements was 10.00 °C/min.**

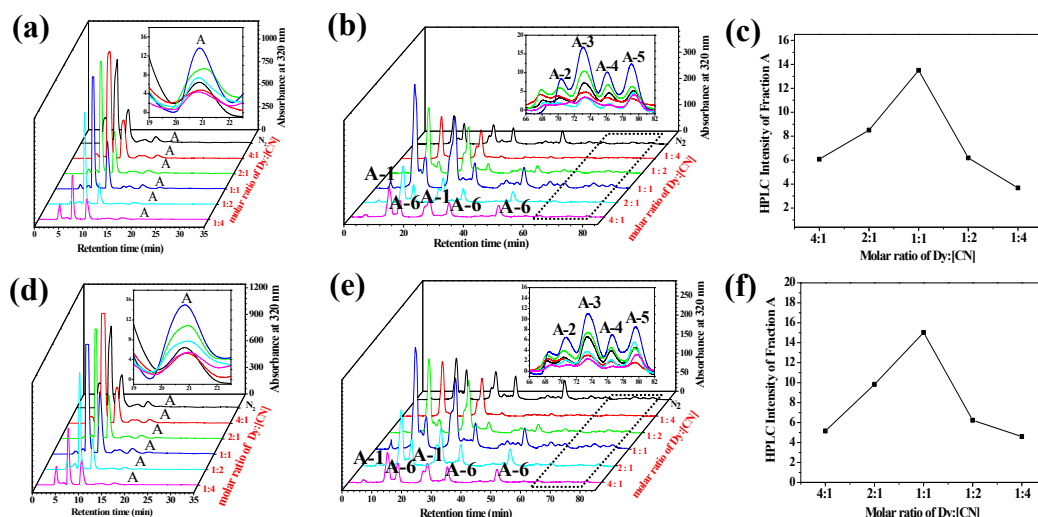

**Fig. S4.** HPLC chromatograms of  $\text{Dy}_2\text{O}_3/\text{K}_3[\text{Fe}(\text{CN})_6]$  and  $\text{Dy}_2\text{O}_3/\text{K}_4[\text{Fe}(\text{CN})_6]$  extracts with different Dy:[CN] molar ratios and HPLC intensity of fraction A. (a, d) HPLC chromatograms of the  $\text{Dy}_2\text{O}_3/\text{K}_3[\text{Fe}(\text{CN})_6]$  (a) and  $\text{Dy}_2\text{O}_3/\text{K}_4[\text{Fe}(\text{CN})_6]$  (d) extracts with different molar ratio (20 mm $\times$ 250 mm 5PYE column; flow rate 15.0 mLmin $^{-1}$ ; injection volume 15 mL; toluene as the eluent (mobile phase); 40°C). (b, e) Recycling HPLC chromatograms of fraction A obtained from  $\text{Dy}_2\text{O}_3/\text{K}_3[\text{Fe}(\text{CN})_6]$  (b) and  $\text{Dy}_2\text{O}_3/\text{K}_4[\text{Fe}(\text{CN})_6]$  (e) extracts with different Dy:[CN] molar ratios (10 mm $\times$ 250 mm BPM column; flow rate 5.0 mL min $^{-1}$ ; injection volume 5 mL; toluene as the eluent (mobile phase); 40 °C). The dotted rhombus marks the enlarged region containing subfractions A-2 to A-6 shown in the inset of Fig. 2c. Inset: the enlarged region of retention time ranging from 66 to 85 min. (c, f) Dependence of HPLC peak intensity of fraction A obtained from  $\text{Dy}_2\text{O}_3/\text{K}_3[\text{Fe}(\text{CN})_6]$  (c) and  $\text{Dy}_2\text{O}_3/\text{K}_4[\text{Fe}(\text{CN})_6]$  (f) extracts on the Dy:[CN] molar ratio.

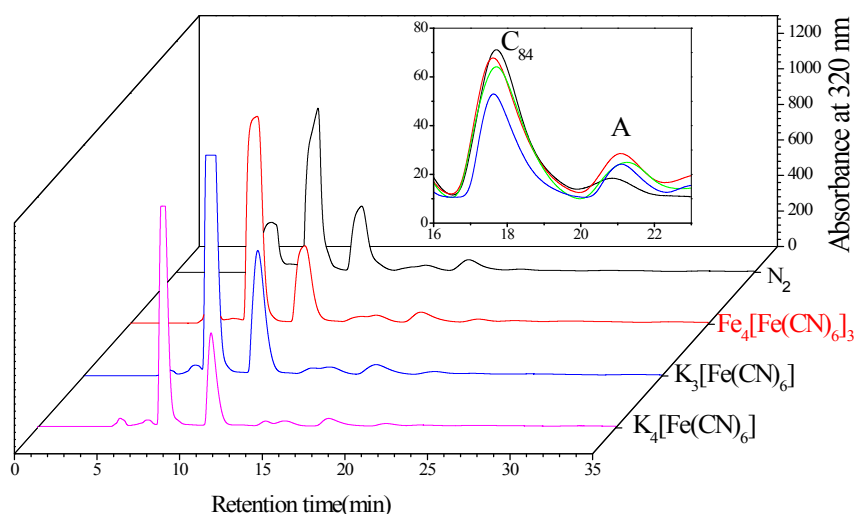

**Fig. S5.** HPLC chromatograms of the  $\text{Dy}_2\text{O}_3/\text{N}_2$ ,  $\text{Dy}_2\text{O}_3/\text{Fe}_4[\text{Fe}(\text{CN})_6]_3$ ,  $\text{Dy}_2\text{O}_3/\text{K}_3[\text{Fe}(\text{CN})_6]$  and  $\text{Dy}_2\text{O}_3/\text{K}_4[\text{Fe}(\text{CN})_6]$  extracts obtained under optimized conditions (20 mm $\times$ 250 mm 5PYE column; flow rate 15.0 mL min $^{-1}$ ; injection volume 15 mL; toluene as the eluent (mobile phase);

40 °C).

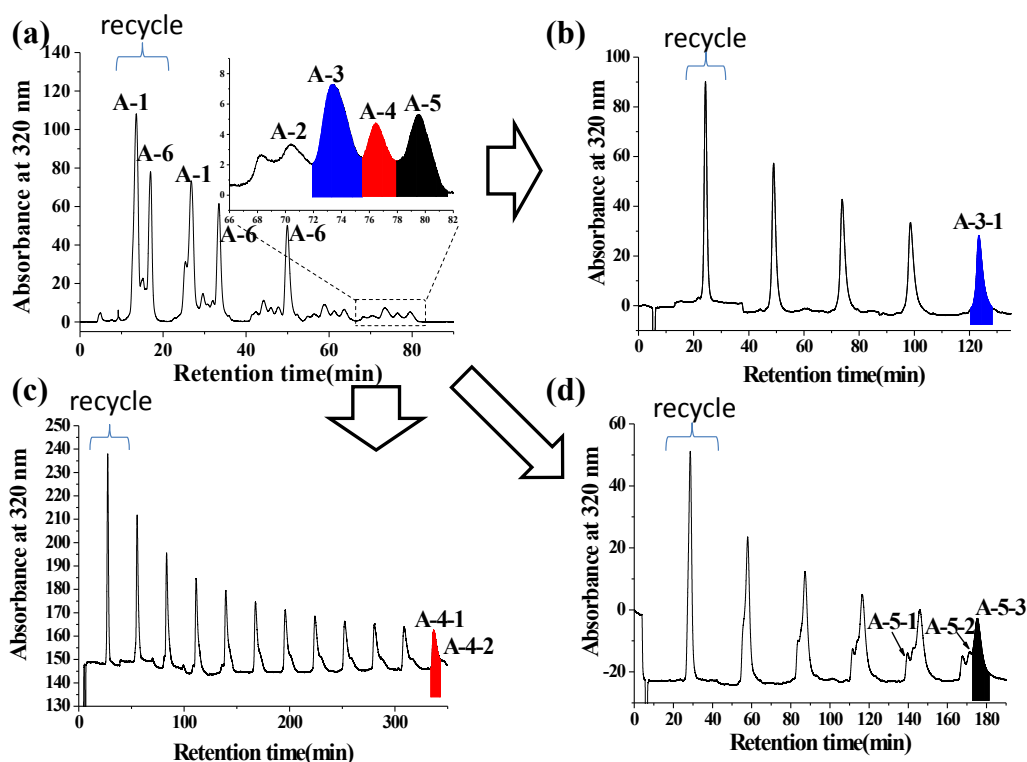

**Fig. S6. Isolation scheme of DyCN@C<sub>82</sub> (I-III).** (a) Recycling HPLC chromatogram of fraction A isolated from the Dy<sub>2</sub>O<sub>3</sub>/Fe<sub>4</sub>[Fe(CN)<sub>6</sub>]<sub>3</sub> extract (10 × 250 mm Buckyrep-M column; flow rate 5.0 ml min<sup>-1</sup>; injection volume 5 ml; toluene as eluent; 40°C). The inset shows the enlarged region of retention time ranging from 66 to 82 min. Subfractions A-1, A-2, A-3, A-4, A-5, A-6 correspond to C<sub>86</sub>, DyCN@C<sub>76</sub>, DyCN@C<sub>82</sub> (I), DyCN@C<sub>82</sub> (II), DyCN@C<sub>82</sub> (III), Dy<sub>3</sub>N@C<sub>80</sub> respectively. A-1 and A-6 were collected during the second and third cycles respectively. Copied from Fig. 2c. (b-d) Recycling HPLC chromatogram of fractions A-3, A-4, A-5 (20 × 250 mm Buckyrep-M column; flow rate 15.0 ml/min; injection volume 15 ml; toluene as eluent; 40°C). A-3-1, A-4-1 and A-5-3 contains DyCN@C<sub>82</sub> (I), DyCN@C<sub>82</sub> (II) and DyCN@C<sub>82</sub> (III), respectively.

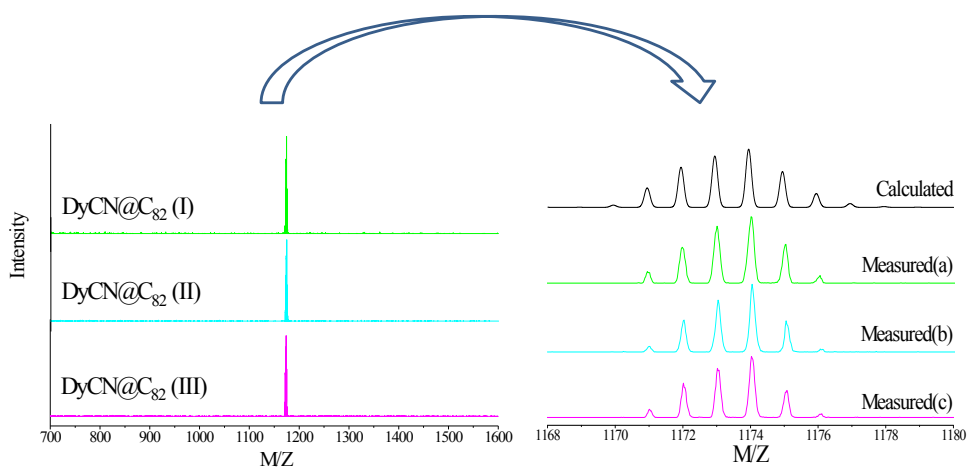

**Fig. S7. MALDI-TOF mass spectra of the purified DyCN@C<sub>82</sub> (I-III) in negative-ion mode.**

Insets: the measured and calculated isotopic distributions.

## **S2. Thermal decomposition mechanism of $K_3[Fe(CN)_6]$ and $K_4[Fe(CN)_6]$ .**

**Scheme S1.** Possible decomposition processes of  $K_3[Fe(CN)_6]$  and  $K_4[Fe(CN)_6]$  during DC-arc discharge process.

1) Thermal decomposition of  $K_3[Fe(CN)_6]$ :

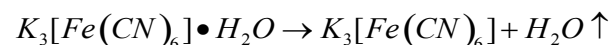

(1)

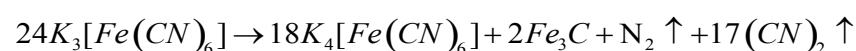

(2)

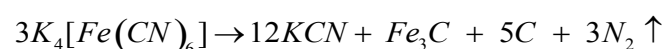

(3)

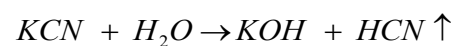

(4)

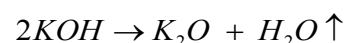

(5)

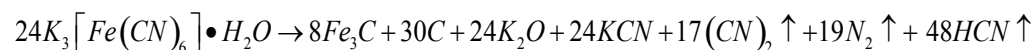

(6)

2) Thermal decomposition of  $K_4[Fe(CN)_6]$ :

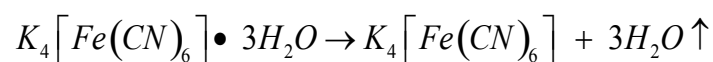

(7)

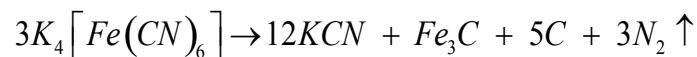

(8)

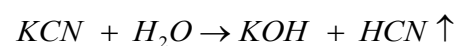

(9)

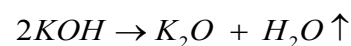

(10)

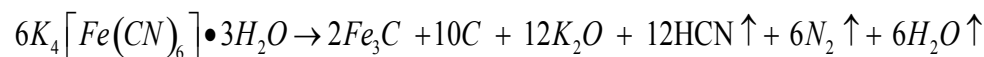

(11)

**S3. X-ray crystallographic analysis of DyCN@C<sub>82</sub> (C<sub>2</sub>(5), C<sub>s</sub>(6), C<sub>2v</sub>(9)).**

**Table S3. Crystal data and data collection parameters.**

| Crystal                           | DyCN@C <sub>2</sub> (5)-                                  | DyCN@C <sub>s</sub> (6)-                                  | DyCN@C <sub>2v</sub> (9)-                                 |
|-----------------------------------|-----------------------------------------------------------|-----------------------------------------------------------|-----------------------------------------------------------|
|                                   | C <sub>82</sub> ·2(DPC)·3(C <sub>7</sub> H <sub>8</sub> ) | C <sub>82</sub> ·2(DPC)·4(C <sub>7</sub> H <sub>8</sub> ) | C <sub>82</sub> ·2(DPC)·4(C <sub>7</sub> H <sub>8</sub> ) |
| Formula weight                    | 3251.78                                                   | 3343.91                                                   | 3343.77                                                   |
| Wavelength( $\lambda$ , Å)        | 0.77488                                                   | 0.77488                                                   | 0.77488                                                   |
| Temperature/K                     | 100(2)                                                    | 100(2)                                                    | 100(2)                                                    |
| Crystal system                    | monoclinic                                                | monoclinic                                                | monoclinic                                                |
| Space group                       | P2 <sub>1</sub> /c                                        | P2 <sub>1</sub> /c                                        | P2 <sub>1</sub> /c                                        |
| a, Å                              | 14.84                                                     | 14.69                                                     | 14.703                                                    |
| b, Å                              | 32.001                                                    | 32.116                                                    | 32.003                                                    |
| c, Å                              | 32.602                                                    | 32.24                                                     | 32.227                                                    |
| $\alpha$ , deg                    | 90                                                        | 90                                                        | 90                                                        |
| $\beta$ , deg                     | 102.65                                                    | 101.86                                                    | 101.7                                                     |
| $\gamma$ , deg                    | 90                                                        | 90                                                        | 90                                                        |
| Volume, Å <sup>3</sup>            | 15106.7                                                   | 14885.618                                                 | 14849.028                                                 |
| Z                                 | 4                                                         | 4                                                         | 4                                                         |
| Unique data( $R_{int}$ )          | 27442(0.056)                                              | 32714(0.146)                                              | 31171(0.114)                                              |
| Parameters                        | 2270                                                      | 3221                                                      | 2492                                                      |
| Restraints                        | 1084                                                      | 2633                                                      | 478                                                       |
| Observed data( $I > 2\sigma(I)$ ) | 24190                                                     | 28143                                                     | 23346                                                     |
| $RI^a$ (observed)                 | 0.1087                                                    | 0.0809                                                    | 0.0905                                                    |
| $wR2^b$ (all data)                | 0.3232                                                    | 0.2443                                                    | 0.2782                                                    |

<sup>a</sup>For data with  $I > 2\sigma(I)$ ,  $RI = 1 \sum ||F_o| - |F_c|| / \sum |F_o|$ . <sup>b</sup>For all data,  $wR2 = \{ \sum [w(F_o^2 - F_c^2)^2] / \sum [w(F_o^2)^2] \}^{1/2}$ .



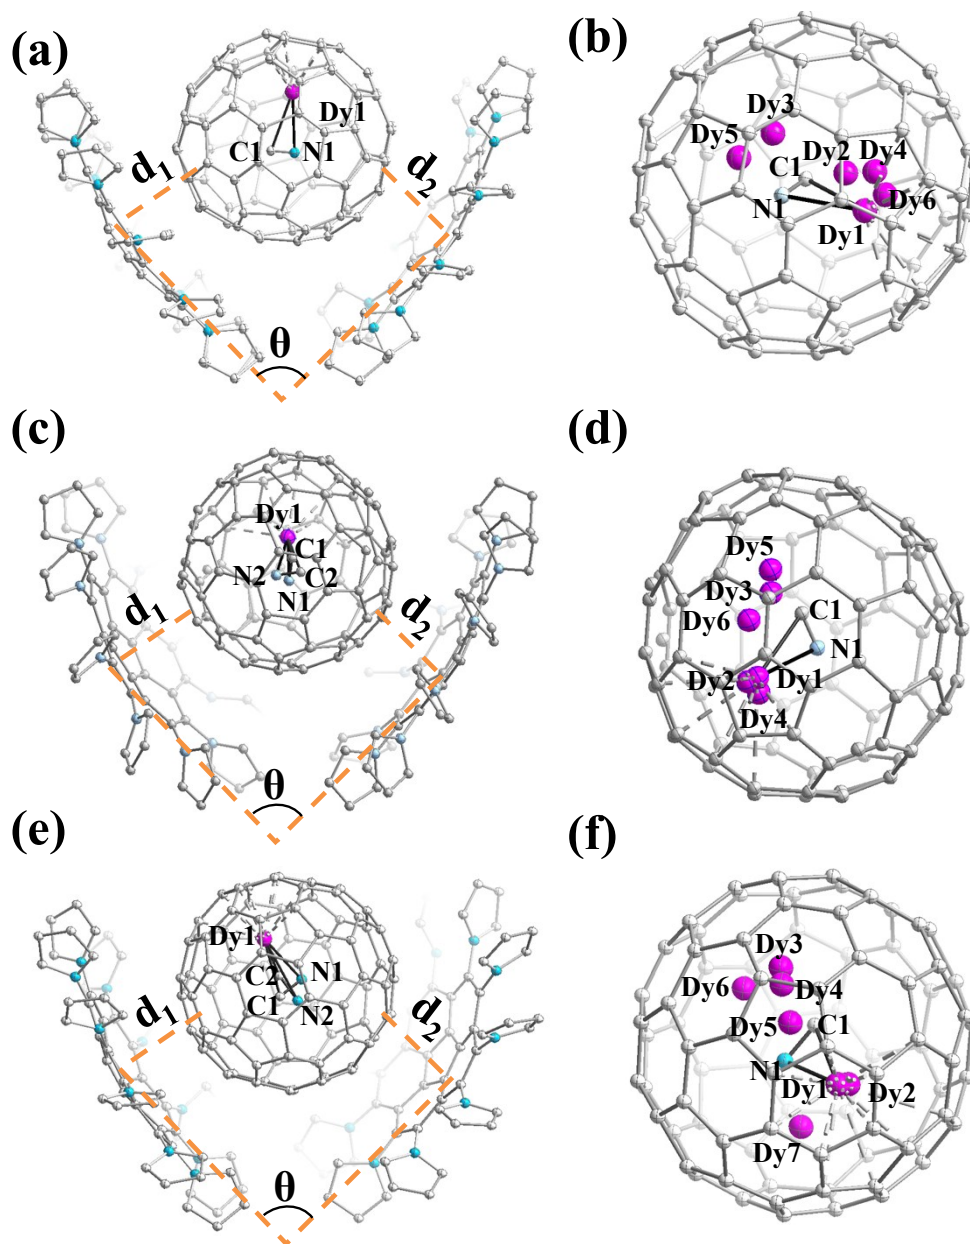

**Fig. S8. Single crystal X-ray structures of DyCN@C<sub>82</sub> (C<sub>2</sub>(5), C<sub>s</sub>(6), C<sub>2v</sub>(9)) showing all Dy sites.** All solvent toluene molecules and hydrogen atoms are omitted for clarity. (a) Structure of DyCN@C<sub>2</sub>(5)-C<sub>82</sub>·2(DPC) with only one predominant Dy (Dy1) and all Dy sites (b), of which the fractional occupancies are 0.4161(15), 0.1556(18), 0.1537(18), 0.138(3), 0.0758(11), and 0.061(3) for Dy1, Dy2, Dy3, Dy4, Dy5 and Dy6, respectively. (c) Structure of DyCN@C<sub>s</sub>(6)-C<sub>82</sub>·2(DPC) with two CN group disorders (the fractional occupancies are 0.65 and 0.35 for C1-N1 and C2-N2 groups, respectively), one predominant Dy (Dy1) and all Dy sites (d), of which the fractional occupancies are 0.369(3), 0.181(3), 0.146(2), 0.127(3), 0.0896(15) and 0.087(2) for Dy1, Dy2, Dy3, Dy4, Dy5 and Dy6, respectively. (e) Structure of DyCN@C<sub>2v</sub>(9)-C<sub>82</sub>·2(DPC) with two CN group disorders (the fractional occupancies are 0.53 and 0.47 for C1-N1 and C2-N2 groups, respectively), one predominant Dy (Dy1) and all Dy sites (d), of which the fractional occupancies are 0.376(3), 0.172(3), 0.127(3), 0.098(3), 0.089(2), 0.0703(18) and 0.0674(11) for Dy1, Dy2,

Dy3, Dy4, Dy5, Dy6 and Dy7, respectively.

**Table S4. The geometric structures parameters of DyCN@C<sub>82</sub>(C<sub>2</sub>(5), C<sub>s</sub>(6), C<sub>2v</sub>(9)) and DPC.**

| Endohedral fullerenes                    | $\theta/^\circ$ | $d_1/\text{\AA}$ | $d_2/\text{\AA}$ |
|------------------------------------------|-----------------|------------------|------------------|
| DyCN@C <sub>2</sub> (5)-C <sub>82</sub>  | 67.15           | 3.33             | 3.30             |
| DyCN@C <sub>s</sub> (6)-C <sub>82</sub>  | 65.16           | 3.28             | 3.29             |
| DyCN@C <sub>2v</sub> (9)-C <sub>82</sub> | 65.57           | 3.31             | 3.30             |

**S4. UV-vis-NIR spectroscopic data of DyCN@C<sub>82</sub> (C<sub>2</sub>(5), C<sub>s</sub>(6), C<sub>2v</sub>(9)).**

**Table S5. Characteristic absorption data of DyCN@C<sub>82</sub>(C<sub>2</sub>(5), C<sub>s</sub>(6), C<sub>2v</sub>(9)).** Other analogous C<sub>82</sub>-based endohedral fullerenes were also listed for comparison.

| Endohedral fullerene                     | Absorption peaks (nm)           | $\lambda_{\text{onset}}$<br>(nm) | $\Delta E_{\text{gap, optical}}$<br>(eV) <sup>a</sup> | Ref.      |
|------------------------------------------|---------------------------------|----------------------------------|-------------------------------------------------------|-----------|
| DyCN@C <sub>2</sub> (5)-C <sub>82</sub>  | 630, 657, 769, 933, 1069        | 1261                             | 0.98                                                  | This work |
| TbCN@C <sub>2</sub> (5)-C <sub>82</sub>  | 392, 627, 656, 763, 923, 1056   | 1240                             | 1.00                                                  | 21        |
| LuCN@C <sub>2</sub> (5)-C <sub>82</sub>  | 631, 662, 764, 941, 1062        | 1242                             | 1.00                                                  | 23        |
| Yb@C <sub>2</sub> (5)-C <sub>82</sub>    | 500, 650, 780, 1020, 1180       | 1350                             | 0.92                                                  | 34        |
| Eu@C <sub>2</sub> (5)-C <sub>82</sub>    | 490, 640, 790, 1020, 1190       | 1360                             | 0.90                                                  | 35        |
| DyCN@C <sub>s</sub> (6)-C <sub>82</sub>  | 497, 744, 1024, 1140, 1339      | 1656                             | 0.75                                                  | This work |
| TbCN@C <sub>s</sub> (6)-C <sub>82</sub>  | 491, 744, 1072, 1132, 1318      | 1620                             | 0.77                                                  | 21        |
| LuCN@C <sub>s</sub> (6)-C <sub>82</sub>  | 494, 596, 744, 1069, 1131, 1345 | 1638                             | 0.76                                                  | 23        |
| Yb@C <sub>s</sub> (6)-C <sub>82</sub>    | 800, 880, 1220, 1450            | 1850                             | 0.67                                                  | 34        |
| DyCN@C <sub>2v</sub> (9)-C <sub>82</sub> | 536, 627, 1144, 1342            | 1785                             | 0.69                                                  | This work |
| TbCN@C <sub>2v</sub> (9)-C <sub>82</sub> | 518, 618, 710, 772, 1144, 1320  | 1770                             | 0.70                                                  | 21        |
| LuCN@C <sub>2v</sub> (9)-C <sub>82</sub> | 512, 621, 697, 782, 1096, 1296  | 1680                             | 0.74                                                  | 23        |
| Yb@C <sub>2v</sub> (9)-C <sub>82</sub>   | 480, 800, 1160, 1500            | 1850                             | 0.67                                                  | 34        |

<sup>a</sup>  $\Delta E_{\text{gap, optical}} = 1240 / \lambda_{\text{onset}}$ .

**S5. Cyclic voltammograms of DyCN@C<sub>82</sub> (C<sub>2</sub>(5), C<sub>s</sub>(6), C<sub>2v</sub>(9)) in different scanning regions.**

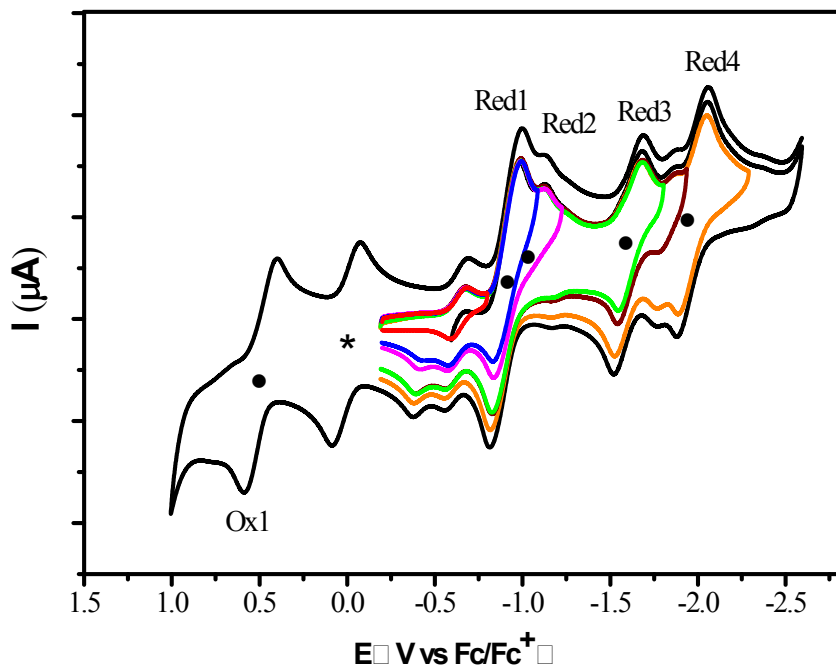

**Fig. S9.** Cyclic voltammograms of DyCN@C<sub>2</sub>(5)-C<sub>82</sub> measured in *o*-DCB solution in different scanning regions showing the correlation of each reduction step with the corresponding re-oxidation step. Scan rate: 100 mV·s<sup>-1</sup>, TBAPF<sub>6</sub> as supporting electrolyte. Each redox step is marked with a number and a solid dot to aid comparison. The asterisk labels the oxidation peak of ferrocene.

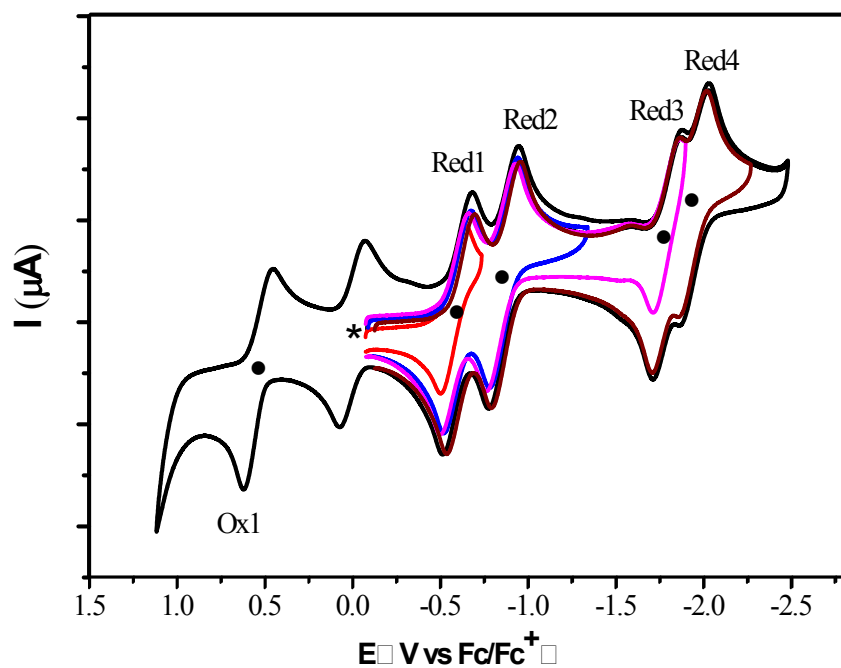

**Fig. S10.** Cyclic voltammograms of DyCN@Cs (6)-C<sub>82</sub> measured in o-DCB solution in different scanning regions showing the correlation of each reduction step with the corresponding re-oxidation step. Scan rate: 100 mV·s<sup>-1</sup>, TBAPF<sub>6</sub> as supporting electrolyte. Each redox step is marked with a number and a solid dot to aid comparison. The asterisk labels the oxidation peak of ferrocene.

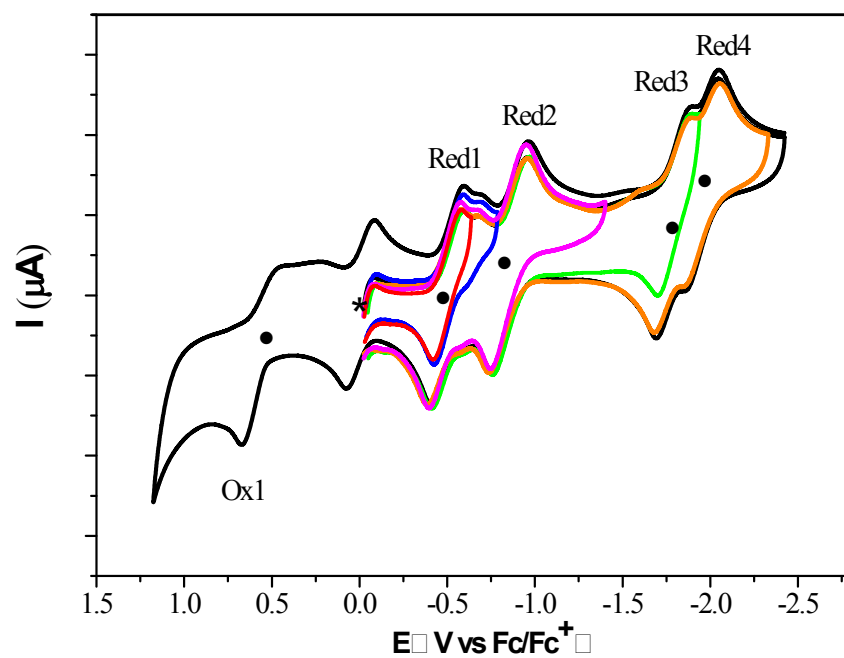

**Fig. S11.** Cyclic voltammograms of **DyCN@C<sub>2v</sub>(9)-C<sub>82</sub>** measured in **o-DCB** solution in different scanning regions showing the correlation of each reduction step with the corresponding re-oxidation step. Scan rate: 100 mV·s<sup>-1</sup>, TBAPF<sub>6</sub> as supporting electrolyte. Each redox step is marked with a number and a solid dot to aid comparison. The asterisk labels the oxidation peak of ferrocene.
